# Supplementary material
Source: PubMed Central journal article supplement (PMC3024702)
Supplement: 1008856108_pnas.1008856108_SI.pdf [file 1008856108_pnas.1008856108_SI.pdf]

# Supporting Information

Khodakovskaya et al. 10.1073/pnas.1008856108

## SI Text

### Photothermal and Photoacoustic Plant Mapping. *Sample preparation.*

The plants tested were extracted from the Murashige and Skoog (MS) medium and washed with phosphate-buffer solution (PBS) at least five times to remove multiwall carbon nanotubes (CNTs). For testing convenience, parts of the sample—such as a whole leaf or root—were detached from the main plant body and gently pressed between a glass slide and thin coverslip with PBS added as the medium for ultrasound propagation. In general, the same procedure could be repeated with intact leaves connected to the plant body. An ultrasonic transducer was placed flat atop the thin coverslip at 4–6  $\mu\text{m}$  lateral distance from the laser spot with a conventional ultrasound gel used for acoustic matching. The thickness of the sample was  $\sim 0.4$  mm for a leaf and  $\sim 0.1$  mm for a root.

**Measuring procedure. PA/PT imaging.** Some of the leaves were dried between glass slides to improve their optical quality. PBS solution was added on the first day to preserve the sample. Light steady pressure was applied to these samples during drying. The dried leaves were  $\sim 0.1$  mm thick. Other than a decrease in leaf light scattering, there were no changes in sample coloring or deformation of cells observed.

Areas of the sample to be tested were selected visually to avoid damaged portions. Before and after each scan, transmission images were recorded and compared (at 20 $\times$  and 60 $\times$  magnification) to control photodamage of the sample. Distribution of light absorbing components in the sample was mapped by photoacoustic (PA) and photothermal (PT) modalities with 10  $\mu\text{m}$  stepping at laser wavelength of 903 nm. Forty PA/PT signals were recorded and averaged for each step to improve detection sensitivity. The same procedure with 740 nm excitation wavelength was used to selectively destroy chlorophyll b in the sample to reveal the structure of vessels.

**PA spectroscopy.** In PA spectroscopy mode (Fig. 2B, PA spectra of plants and of the CNTs in model sample), the PA signals at different wavelengths of the optical parametric oscillator (OPO) were acquired from the same point of the sample. 100 PA signals were averaged for each laser wavelength; the spectral range was automatically scanned by OPO with a 5 nm step. The total analysis duration was less than 3 min. Peak-to-peak amplitudes of the averaged PA signals were used to construct a PA spectrum of the sample. PA spectra of the green and nongreen tomato leaves were calculated as an average of seven spectra taken from different parts of the leaf (Fig. 2B).

**PT spectroscopy.** In PT spectroscopy mode, images were acquired at different wavelengths from the same small sample area (50  $\times$  50  $\mu\text{m}$ , 5  $\mu\text{m}$  step size). For CNTs in tomato, PT signal amplitudes were averaged for the area where PT signals exceeded background level. PT spectra of plant tissues were calculated as an average of all of the signals around CNTs inclusion. Absolute values of PT signal were used to construct PT spectra.

**Signals processing.** For each laser pulse there were two signals acquired simultaneously: PA response (ultrasonic oscillations recorded by transducer) and PT signal (modulation of the probe beam intensity recorded by a photodiode). For each mapping step, PA/PT cytometer acquired and averaged 40 signals from 40 successive laser pulses.

**PA signal processing.** Time-gating was used to eliminate laser-caused electronic noise and the false signal from scattered light in transducer-recorded PA signals. The remaining part of the signal (from 3rd to 15th  $\mu\text{s}$  after the laser pulse) was recorded and digitally filtered with a bandpass filter to leave oscillations in the 750 kHz–4.5 MHz range only. The maximal amplitude of the acoustic oscillations in this range was considered as a desired PA signal representing the sample's response on the laser pulse. The PA map included two-dimensional coordinates of the irradiated sample spot and the corresponding PA signal amplitude.

**PT thermal-lens signal processing.** With the configuration selected, there were two typical shapes of PT thermal-lens signals observed: linear long positive signals and short nonlinear negative signals. Long positive signals (duration of signal  $\sim 30$   $\mu\text{s}$ ), corresponding to the formation of linear thermal lens in the sample (focusing of the probe beam on refraction index gradient leading to increase in probe beam intensity), were associated with light absorption by the bulk of the sample, i.e., by the plant tissues. Short negative signals correspond to nonlinear processes emerging due to excessive heat generation and formation of nanobubbles around nanoparticles. A nanobubble defocuses or scatters probe light beam (decrease in probe beam intensity) and collapses in 0.2–7  $\mu\text{s}$ .

Detection of the PT thermal-lens phenomenon in the sample is little affected by scattering of the probe beam or low frequency oscillations of its intensity. For processing PT data and calculation of thermal-lens strength, we used normalization of recorded photodiode readings on the level of probe beam intensity (not AC recording mode). Furthermore, we used relative change in probe beam intensity as a measure of thermal-lens effect. Recorded probe beam modulations normalized on initial probe beam intensity could be averaged in time domain and compared for different sample zones.

From each set of photodiode readings there were three signals determined: (i) probe beam intensity before laser pulse,  $I_0$ ; and two curve parameters corresponding to expected types of thermal-lens signal; (ii) averaged level of photodiode readings in 8–9  $\mu\text{s}$  interval,  $\Delta I_{\text{lin}}$  (linear thermal-lens effect); and (iii) lower value of photodiode readings in 0–8  $\mu\text{s}$  time interval after the laser pulse,  $\Delta I_{\text{neg}}$ , (nonlinear bubbles effect).

To improve detection sensitivity, PT signals were processed as follows: for each photodiode reading set recorded for a laser pulse average value of 400 probe beam intensity readings were considered as  $I_0$  value (duration of dataset recorded before laser pulse). Thereafter, all of the normalized photodiode readings curves,  $\Delta I(t)$ , recorded for the same sample spot were averaged in time domain (40 signals per spot).  $\Delta I_{\text{lin}}$  linear thermal-lens signal was calculated from the averaged curve as an average of 200 photodiode readings corresponding to 8–9  $\mu\text{s}$  interval after laser pulse. For description of fast signals from nanobubbles, we used curve smoothing with moving average trend for corresponding photodiode readings in 0–8  $\mu\text{s}$ .  $\Delta I_{\text{neg}}$  was calculated from this smoothed curve (smoothing period was selected to be much lower than that for linear signals: 20 signals = 0.1  $\mu\text{s}$  in order not to degrade fast signal amplitude).

**Statistical analysis.** For continuous variables, the summaries included sample size, mean and standard deviation (or median and interquartile range), and minimum and maximum. For categorical variables, the summaries included frequencies and per-

centages. The coefficient of variation (i.e., Standard Deviation/ Mean  $\times$  100) was calculated for each presented condition. All data were expressed as means  $\pm$  SD. Differences among three or more groups were evaluated by means of one-way ANOVA test and independent-sample *t*-test performed for two-group comparisons. Analyses were conducted in statistical software SAS, and *P*-values of 0.05 or less were considered to indicate significance.

#### **Detection of Carbon Nanotubes in Tomato Fruits of Plants Grown in Soil Supplemented with Multiwall Carbon Nanotubes. Experiment.**

The tomato plants (cv. Micro-Tom) were germinated from seeds in pots using a commercially available soil mix (*Sun Gro Redi-earth Plug and Seedlings Mix*, Sun Gro Horticulture, Inc.). All plants were grown in a growth chamber under 9 h light (26 °C) and 15 h dark (22 °C), 45% humidity and 500  $\mu\text{mol}/\text{m}^2/\text{s}$  light intensity. The plants were watered once a day. Established young (three-week-old plants) were used for experiments with multiwall CNTs. For our experiments, tomato plants were divided into several groups containing eight plants each. The first group served as the control group, and control plants were grown as described above including watering with tap water. The second group contained plants that were germinated in a medium supplemented with CNTs (50  $\mu\text{g}/\text{mL}$ ), then transferred into soil pots and watered with tap water. The third group contained plants that were grown in soil containing CNTs. The fourth group contained plants that were germinated in agar medium containing CNTs in a concentration of 50  $\mu\text{g}/\text{mL}$ ; next, the seedlings were transferred into soil supplemented with CNTs. For the addition of CNTs to soil, we used water containing multiwall CNTs in a concentration of 50  $\mu\text{g}/\text{mL}$ . The CNT-water solution (50 mL) was carefully added to the soil mix in each experimental pot. We carefully avoided direct contact of the CNT solution with the tomato plants. The plants were treated with CNTs once per week (each Wednesday). On other days of the week, these plants were watered only with tap water. Eight-week-old plants from all experimental groups produced green fruits which were collected and subjected for detection of CNTs inside fruits. For the preparation of samples, control green fruits and fruits from plants grown in soil supplemented with CNTs were ground in mortars. Each homogenized fruit was stabilized in a small amount of buffer (RLT buffer, Qiagen, Inc) supplemented with  $\beta$ -mercaptoethanol. RLT buffer-one fruit squash mix was spread in thin (almost transparent) films and analyzed using the Raman spectroscopy. Raman scattering spectra were obtained with a Raman spectrometer (Horiba Jobin Yvon LabRam HR800) with 1,800 and 600 lines/mm gratings equipped and a Peltier-cooled CCD camera. Raman spectra were calibrated with standard silicon wafer using a specific peak of 521  $\text{cm}^{-1}$  of the silicon. For all of the experiments, a 785 nm laser diode was used for excitation with power at the sample surface of 80 mW and a spot size of

1  $\mu\text{m}$ . The scattered light was collected in the back-scattering geometry by a confocal Raman microscope on an Olympus BX-51 platform with 100 $\times$  micro-objectives.

#### **Raman spectroscopy for detection of nanoparticles in tomato fruits.**

Raman spectroscopy was used to detect the presence of multiwall CNTs in the fruits for the plants that were grown on CNT-containing medium only, CNT-containing soil only, and CNT-containing both medium and soil.

The Raman spectra of the multiwall CNTs contained several characteristic peaks: D band (ranging between 1,300 to 1,350  $\text{cm}^{-1}$  which correspond to the defects in the graphitic structure; G band (ranging between 1,500 to 1,600  $\text{cm}^{-1}$ ) corresponding to the  $E_{2g}$  splitting for the graphitic structures; and finally the two-dimensional band (ranging between 2,600 to 2,700  $\text{cm}^{-1}$ ) which is a second order harmonic of the D band (1). Given the strong intensity of the G band, its intensity can be used for the detection and relative quantification of the CNT presence in the focal volume of the laser used for the Raman excitation. Although Raman spectroscopy is a relative method, it gives strong evidence for the presence of nanotubes in a particular sample and their relative concentration. Based on these considerations, it was found that the multiwall CNTs were able to reach the tomato fruits for all exposure conditions. Nonetheless, it is very difficult to completely compare the relative uptake amounts of the CNTs into fruits for those situations in which the CNTs were introduced at various stages of the plant developmental cycles, or when the nanotubes were exposed to the medium only, soil only, or combined into soil and medium. An interesting observation also supported by our PA/PT analysis is that the multiwall CNTs were found to form small agglomerates inside the fruit tissues. Furthermore, based on the relative intensity of the G band as acquired for the various situations, it was observed that the multiwall CNTs were up-taken into the tomato fruits in slightly larger amounts when the nanotubes were introduced into the medium only as compared to soil only. This observation can be explained by the more uniform CNT distribution in the medium as compared to the soil, where they can agglomerate and be transported by moisture away from the plant root system. As a result, it is suggested that soil conditions have a strong influence on the CNT ability to be uptaken by the plants, given variations in the pH and other chemical characteristics of the soil that could induce an agglomeration of the CNTs, which could result in large clusters that cannot be absorbed by the plants. Interestingly, it can be seen that the multiwall CNTs seem to be absorbed into the fruits/plants both from the medium, as well as from the soil (higher G band intensity for this case), through a continuous uptake process, indicating that the CNTs have the ability to penetrate the plant systems at various developmental stages. The presence of the CNTs in the fruit clearly indicates the considerable ability of the CNTs to distribute into all plant tissues.

1. Dresselhaus MS, Dresselhaus G, Saito R, Jorio A (2005) Raman spectroscopy of carbon nanotubes. *Phys Rep* 409:7–99.















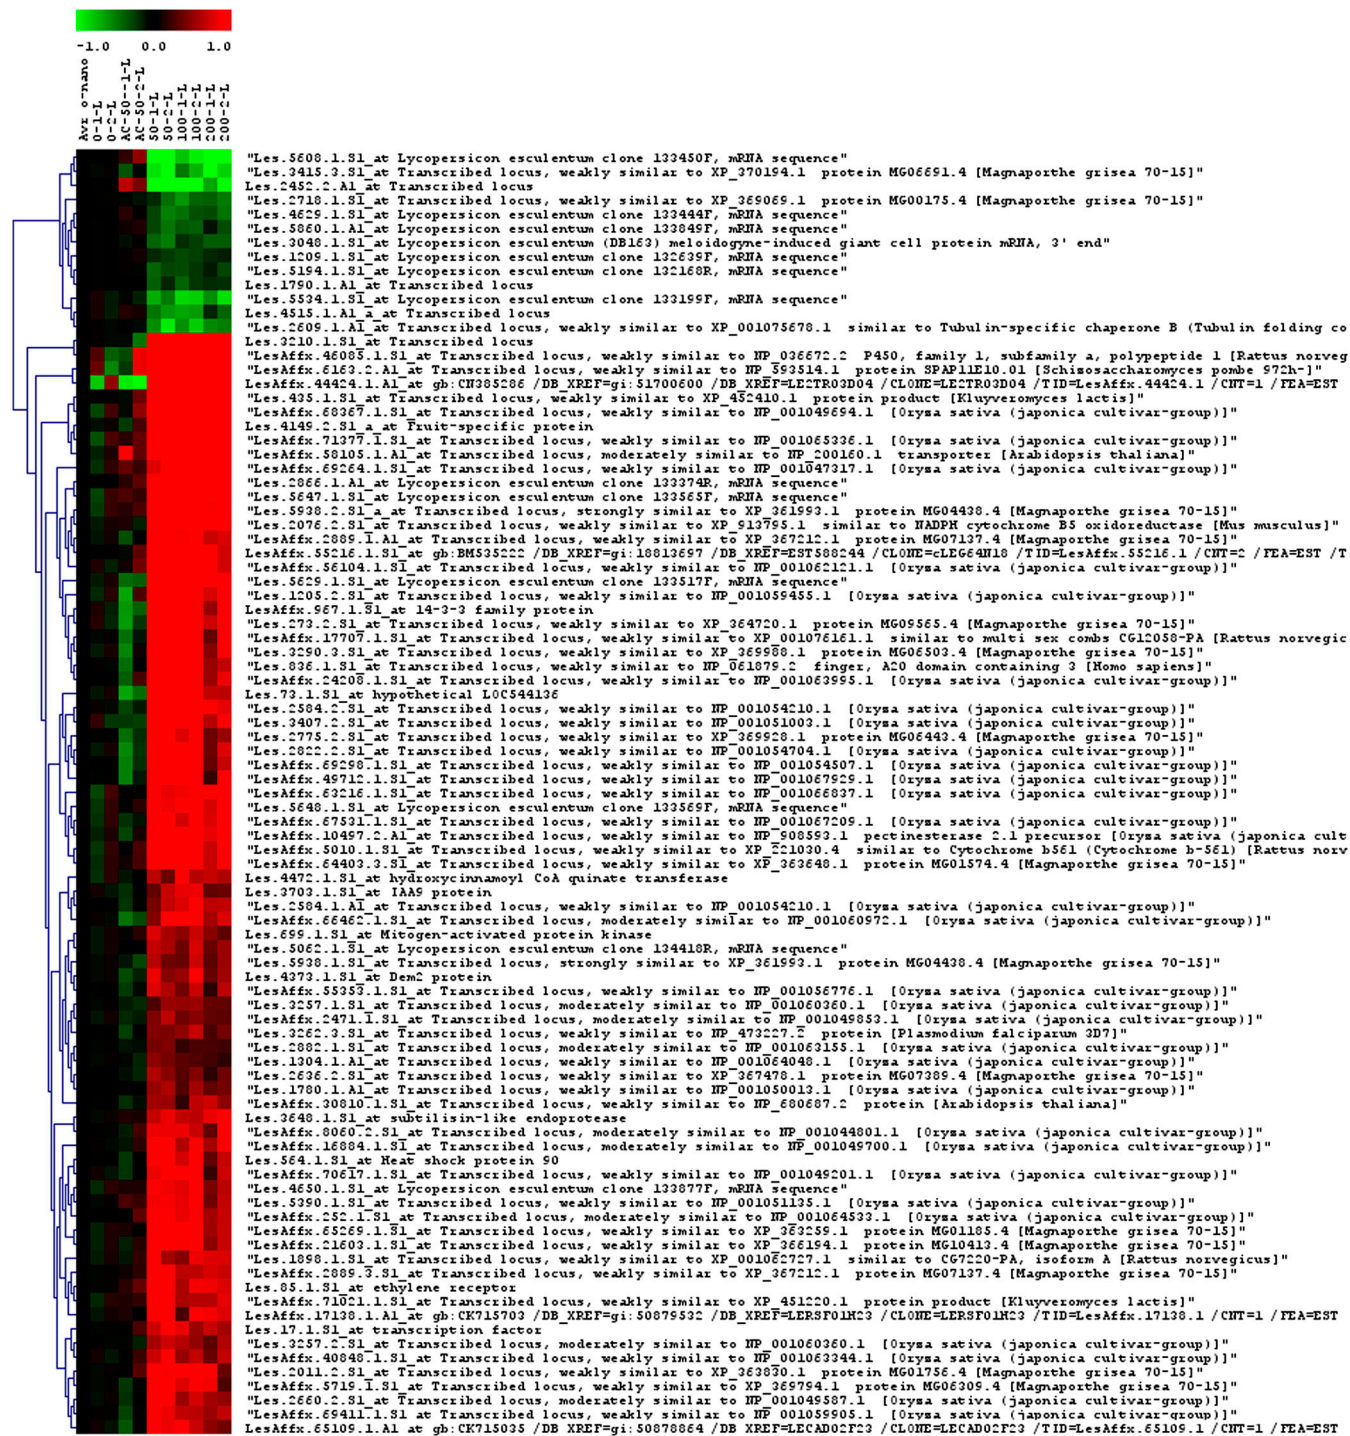

Fig. S7. Transcript profile of CNTs specific (controls/tissues exposed to carbonaceous materials) differences in gene expression in leaf tissues of 10-day-old seedlings. Hierarchical clustering (Euclidean distance) of log (2) fold changes over the average control (seedlings grown without carbon additions) fluorescence intensity. Two independent biological replicates for each treatment are presented here.

Abbreviations of samples:

- 0- tissues unexposed to carbonaceous materials;
- AC-50- tissues exposed to activated carbon (50 ug/mL);
- 50- tissues exposed to multiwall carbon nanotubes (50 ug/mL);
- 100- tissues exposed to multiwall carbon nanotubes (100 ug/mL);
- 200- tissues exposed to multiwall carbon nanotubes (200 ug/mL).



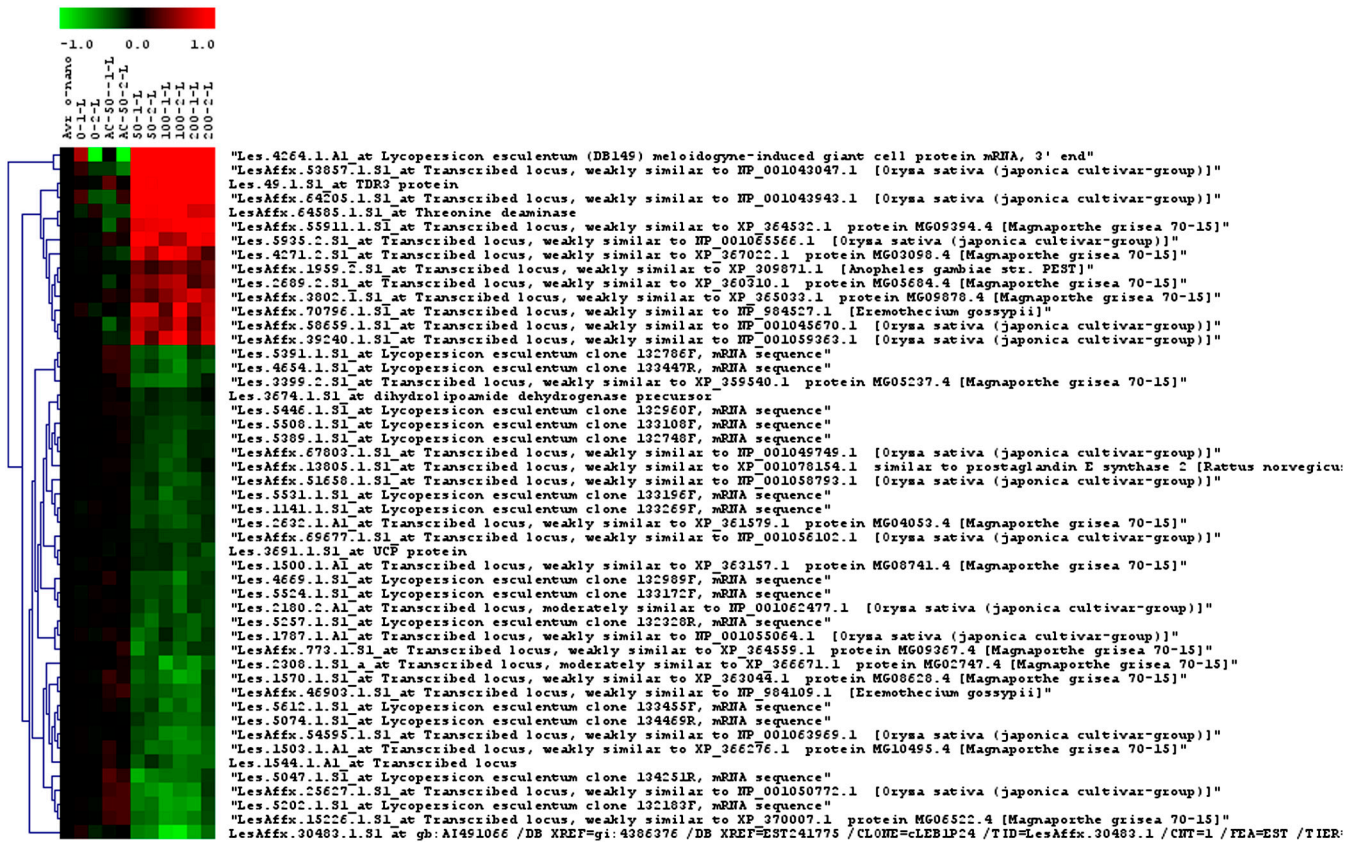

Fig. S8. Transcript profile of CNTs specific (controls/tissues exposed to carbonaceous materials) differences in gene expression in root tissues of 10-day-old seedlings. Hierarchical clustering (Euclidean distance) of log (2) fold changes over the average control (roots of seedlings grown without carbon additions) fluorescence intensity.

Two independent biological replicates for each treatment are presented here.

**Abbreviations of samples:**

- 0- tissues unexposed to carbonaceous materials;
- AC-50- tissues exposed to activated carbon (50 ug/mL);
- 50- tissues exposed to multiwall carbon nanotubes (50 ug/mL);
- 100- tissues exposed to multiwall carbon nanotubes (100 ug/mL);
- 200- tissues exposed to multiwall carbon nanotubes (200 ug/mL).
